# Supplementary material for: Propionamide participating in H2SO4-based new particle formation: a theory study
Source: Royal Society of Chemistry journal article supplement (doi:10.1039/d0ra09323h), 2020-12-23
Supplement: d0ra09323h1.pdf [file d0ra09323h1.pdf]

## Supporting Information

### Propionamide Participating in H<sub>2</sub>SO<sub>4</sub>-based New Particle Formation: A Theory Study

Xianwei Zhao<sup>1</sup>, Yunfeng Li<sup>1,3</sup>, Chenpeng Zuo<sup>1</sup>, Yanhui Sun<sup>5</sup>, Fei Xu<sup>1,4,\*</sup>, Alexey B. Nadykto<sup>2,\*</sup>, Lin Du<sup>1</sup>, Yisheng Xu<sup>3</sup>, Qingzhu Zhang<sup>1</sup>, Wenxing Wang<sup>1</sup>

<sup>1</sup>Environment Research Institute, Shandong University, Qingdao 266237, P. R. China

<sup>2</sup>Department of Applied Mathematics, Moscow State University of Technology “Stankin”, Vadkovsky 1, Moscow 127055, Russia

<sup>3</sup> Chinese Research Institute Environmental Science, State Key Laboratory Environmental Criteria & Risk Assessment, Beijing 100012, P. R. China

<sup>4</sup>Shenzhen Research Institute of Shandong University, Shenzhen 518057, P. R. China

<sup>5</sup>College of Environment and Safety Engineering, Qingdao University of Science & Technology, Qingdao 266042, P. R. China

\*Corresponding authors. E-mail: xufei@sdu.edu.cn.

\*Corresponding authors. E-mail: a.nadykto@stankin.ru.

Fax: 86-532-5863 1986; 7495-9729521.

#### Boundary condition

**Figure S1.** The ratio between the monomer collision rate and the cluster total evaporation rate for (PA)<sub>m</sub>(SA)<sub>n</sub> (m = 0–3 and n = 0–3) at 298.15 K.

**Figure S2.** Main clustering pathways (left panel) and actual Gibbs free energy surface for the formation of (DMA)<sub>m</sub>(SA)<sub>n</sub> clusters (right panel) at 298.15 K, [H<sub>2</sub>SO<sub>4</sub>] = 10<sup>6</sup> cm<sup>-3</sup>, and [DMA] = 10 ppt.

**Figure S3.** Evaporation rates for (DMA)<sub>m</sub>(SA)<sub>n</sub> clusters at 298.15 K.

**Table S1.** Evaporation coefficients (s<sup>-1</sup>) for all evaporation pathways of the (PA)<sub>m</sub>(SA)<sub>n</sub> (m = 0–3 and n = 0–3) clusters under simulation at 298.15 K.

**Table S2.** Coordinates of all optimized clusters.

**Boundary condition.** Boundary conditions require that the growing clusters could be sufficiently stable and the clusters should be more likely to grow than evaporate. For  $(\text{PA})_m(\text{SA})_n$  ( $m = 0-3$  and  $n = 0-3$ ) clusters, clusters with roughly equal numbers of SA and PA molecules or the number of SA molecules is one more than that of PA molecules have lower evaporation rates and higher concentrations in the simulations. Therefore, we suppose that  $(\text{PA})_4(\text{SA})_4$  and  $(\text{PA})_3(\text{SA})_4$  clusters are stable enough and do not evaporate. In the ACDC simulation,  $(\text{PA})_4(\text{SA})_4$  and  $(\text{PA})_3(\text{SA})_4$  that can be formed by collisions between small clusters or evaporation of larger clusters in the simulation could leave the simulation box. Similarly, for  $(\text{DMA})_m(\text{SA})_n$  ( $m = 0-3$  and  $n = 0-3$ ) clusters,  $(\text{DMA})_4(\text{SA})_4$  and  $(\text{DMA})_3(\text{SA})_4$  could leave the simulation box. All other clusters crossing the box edge for  $\text{H}_2\text{SO}_4$ -PA and  $\text{H}_2\text{SO}_4$ -DMA system will be brought back to the simulation box by monomer evaporations.

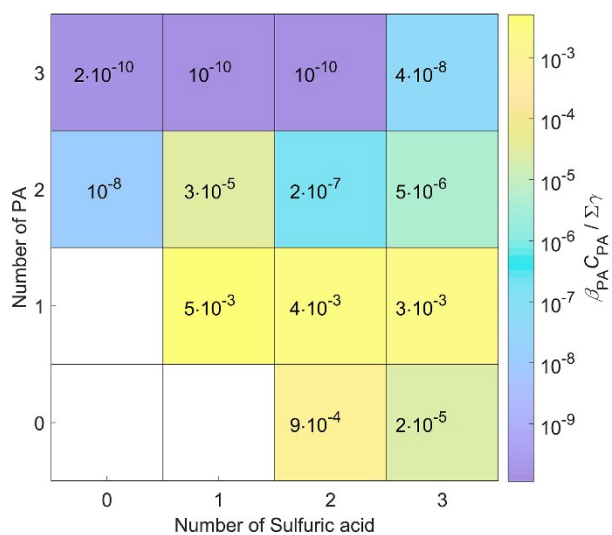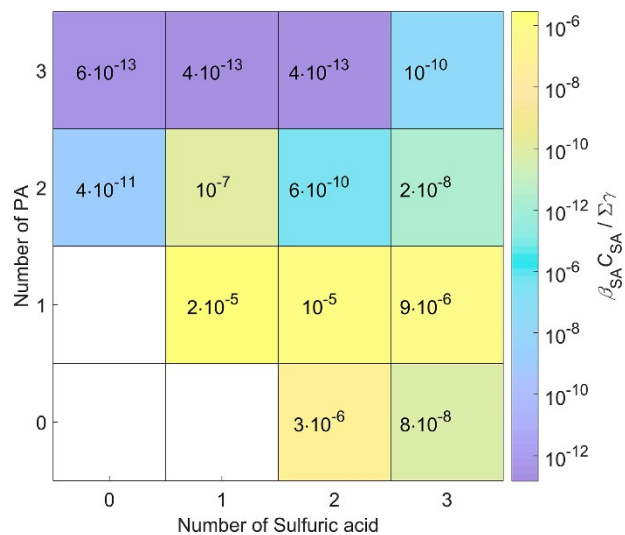

**Figure S1.** The ratio between the monomer collision rate and the cluster total evaporation rate for  $(PA)_m(SA)_n$  ( $m = 0-3$  and  $n = 0-3$ ) at 298.15 K

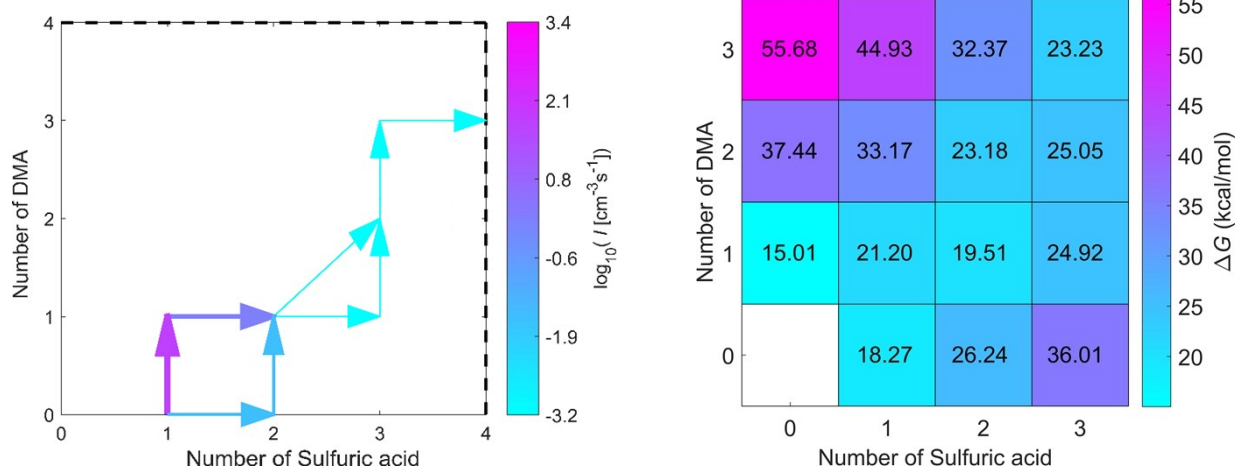

**Figure S2.** Main clustering pathways (left panel) and actual Gibbs free energy surface for the formation of  $(\text{DMA})_m(\text{SA})_n$  clusters (right panel) at 298.15 K,  $[\text{H}_2\text{SO}_4] = 10^6 \text{ cm}^{-3}$ , and  $[\text{DMA}] = 10 \text{ ppt}$ .

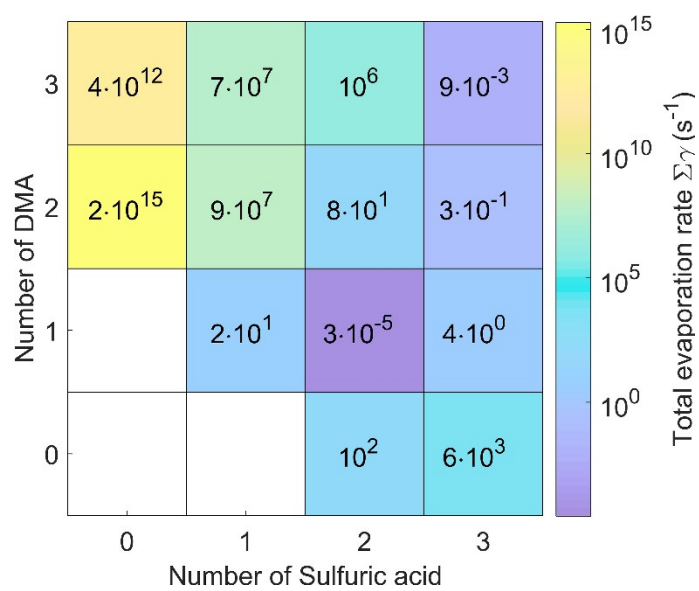

**Figure S3.** Evaporation rates for (DMA)<sub>m</sub>(SA)<sub>n</sub> clusters at 298.15 K.

**Table S1.** Evaporation coefficients ( $s^{-1}$ ) for all evaporation pathways of the  $(PA)_m(SA)_n$  ( $m = 0-3$  and  $n = 0-3$ ) clusters under simulation at 298.15 K.

|                                                    | Evaporation coefficients |
|----------------------------------------------------|--------------------------|
| $(SA)_2 \rightarrow SA + SA$                       | 1.21E+02                 |
| $(SA)_3 \rightarrow (SA)_2 + SA$                   | 5.53E+03                 |
| $(PA)(SA) \rightarrow PA + SA$                     | 2.42E+01                 |
| $(PA)(SA)_2 \rightarrow (PA)(SA) + SA$             | 3.33E+01                 |
| $(PA)(SA)_2 \rightarrow (SA)_2 + PA$               | 3.14E+00                 |
| $(PA)(SA)_3 \rightarrow (PA)(SA)_2 + SA$           | 4.90E+01                 |
| $(PA)(SA)_3 \rightarrow (PA)(SA) + (SA)_2$         | 5.41E+00                 |
| $(PA)(SA)_3 \rightarrow (SA)_3 + PA$               | 2.66E-02                 |
| $(PA)_2 \rightarrow PA + PA$                       | 1.21E+07                 |
| $(PA)_2(SA) \rightarrow (PA)_2 + SA$               | 4.49E-03                 |
| $(PA)_2(SA) \rightarrow (PA)(SA) + PA$             | 4.23E+03                 |
| $(PA)_2(SA)_2 \rightarrow (PA)_2(SA) + SA$         | 4.35E+03                 |
| $(PA)_2(SA)_2 \rightarrow (PA)_2 + (SA)_2$         | 6.21E-02                 |
| $(PA)_2(SA)_2 \rightarrow (PA)(SA)_2 + PA$         | 5.30E+05                 |
| $(PA)_2(SA)_2 \rightarrow (PA)(SA) + (PA)(SA)$     | 3.11E+05                 |
| $(PA)_2(SA)_3 \rightarrow (PA)_2(SA)_2 + SA$       | 1.25E+00                 |
| $(PA)_2(SA)_3 \rightarrow (PA)_2(SA) + (SA)_2$     | 1.54E+01                 |
| $(PA)_2(SA)_3 \rightarrow (PA)_2 + (SA)_3$         | 1.15E-05                 |
| $(PA)_2(SA)_3 \rightarrow (PA)(SA)_3 + PA$         | 1.31E+04                 |
| $(PA)_2(SA)_3 \rightarrow (PA)(SA)_2 + (PA)(SA)$   | 2.00E+04                 |
| $(PA)_3 \rightarrow (PA)_2 + PA$                   | 8.61E+08                 |
| $(PA)_3(SA) \rightarrow (PA)_3 + SA$               | 6.53E-03                 |
| $(PA)_3(SA) \rightarrow (PA)_2(SA) + PA$           | 1.21E+09                 |
| $(PA)_3(SA) \rightarrow (PA)_2 + (PA)(SA)$         | 1.83E+05                 |
| $(PA)_3(SA)_2 \rightarrow (PA)_3(SA) + SA$         | 3.91E+01                 |
| $(PA)_3(SA)_2 \rightarrow (PA)_3 + (SA)_2$         | 7.04E-04                 |
| $(PA)_3(SA)_2 \rightarrow (PA)_2(SA)_2 + PA$       | 1.05E+07                 |
| $(PA)_3(SA)_2 \rightarrow (PA)_2(SA) + (PA)(SA)$   | 1.38E+09                 |
| $(PA)_3(SA)_2 \rightarrow (PA)(SA)_2 + (PA)_2$     | 1.79E+05                 |
| $(PA)_3(SA)_3 \rightarrow (PA)_3(SA)_2 + SA$       | 9.33E-02                 |
| $(PA)_3(SA)_3 \rightarrow (PA)_3(SA) + (SA)_2$     | 9.21E-03                 |
| $(PA)_3(SA)_3 \rightarrow (PA)_3 + (SA)_3$         | 8.70E-09                 |
| $(PA)_3(SA)_3 \rightarrow (PA)_2(SA)_3 + PA$       | 7.67E+05                 |
| $(PA)_3(SA)_3 \rightarrow (PA)_2(SA)_2 + (PA)(SA)$ | 2.64E+04                 |
| $(PA)_3(SA)_3 \rightarrow (PA)_2(SA) + (PA)(SA)_2$ | 2.97E+06                 |
| $(PA)_3(SA)_3 \rightarrow (PA)_2 + (PA)(SA)_3$     | 2.94E+02                 |

**Table S2.** Coordinates of all optimized clusters.

|                                                |             |             |             |
|------------------------------------------------|-------------|-------------|-------------|
| H <sub>2</sub> SO <sub>4</sub>                 |             |             |             |
| S                                              | 0.00026100  | -0.14164400 | 0.00000000  |
| O                                              | 0.00053600  | -0.85706900 | -1.22344500 |
| O                                              | 0.00732500  | -0.85615700 | 1.22399000  |
| O                                              | 1.13855000  | 0.94120200  | -0.00339100 |
| O                                              | -1.14639600 | 0.93205300  | 0.00260700  |
| H                                              | -2.00285400 | 0.48510900  | 0.00387500  |
| H                                              | 1.99855000  | 0.50096700  | -0.00196100 |
| (H <sub>2</sub> SO <sub>4</sub> ) <sub>2</sub> |             |             |             |
| S                                              | -2.07325700 | 0.07047100  | 0.11993300  |
| O                                              | -3.33837400 | 0.66690900  | 0.41607800  |
| O                                              | -1.12697600 | -0.22456900 | 1.18397200  |
| O                                              | -2.29025300 | -1.35668300 | -0.58679500 |
| H                                              | -3.04913600 | -1.28785100 | -1.19746200 |
| O                                              | -1.38385400 | 0.93792600  | -0.98661100 |
| H                                              | -0.40663900 | 0.67919800  | -1.08309300 |
| S                                              | 2.07325500  | -0.07050200 | -0.11992000 |
| O                                              | 1.12695700  | 0.22445400  | -1.18396700 |
| O                                              | 3.33837400  | -0.66694900 | -0.41605100 |
| O                                              | 2.29026200  | 1.35675200  | 0.58660400  |
| H                                              | 3.04913400  | 1.28797200  | 1.19728800  |
| O                                              | 1.38387000  | -0.93779900 | 0.98675300  |
| H                                              | 0.40662000  | -0.67915600 | 1.08318900  |
| (H <sub>2</sub> SO <sub>4</sub> ) <sub>3</sub> |             |             |             |
| S                                              | 0.00993600  | 0.51347300  | 0.08237400  |
| O                                              | -0.86511800 | 1.67228600  | -0.38397500 |
| H                                              | -1.80503000 | 1.37223700  | -0.56333800 |
| O                                              | 0.53301800  | -0.05835100 | -1.24488500 |
| H                                              | 1.44635500  | -0.44618800 | -1.12810200 |
| O                                              | -0.79907800 | -0.46818500 | 0.74736600  |
| O                                              | 1.09915900  | 1.05930100  | 0.83210900  |
| S                                              | -4.01039400 | -0.24987000 | -0.12508000 |
| O                                              | -4.23471200 | 0.37753100  | 1.29757000  |
| H                                              | -4.91583800 | -0.11499500 | 1.77580100  |
| O                                              | -3.13467500 | -1.48383400 | 0.15573600  |
| H                                              | -2.20478600 | -1.20560200 | 0.38023100  |
| O                                              | -3.23966700 | 0.73743900  | -0.82100200 |
| O                                              | -5.23956100 | -0.69449700 | -0.65154000 |
| S                                              | 3.99100100  | -0.39311200 | -0.00978300 |
| O                                              | 3.49815500  | 0.11716100  | 1.35755900  |
| H                                              | 2.58009800  | 0.48810400  | 1.27835400  |
| O                                              | 4.27730700  | 0.92596600  | -0.81432300 |
| H                                              | 5.12729900  | 1.30212100  | -0.54777300 |
| O                                              | 2.90285200  | -1.00066300 | -0.71515100 |
| O                                              | 5.19272200  | -1.09959400 | 0.19611700  |
| PA                                             |             |             |             |
| C                                              | 1.91863600  | 0.12622500  | -0.00022500 |
| H                                              | 1.94858400  | 0.76094900  | -0.88620000 |
| H                                              | 2.82689700  | -0.47273500 | -0.00000200 |
| H                                              | 1.94873800  | 0.76179400  | 0.88514000  |
| C                                              | 0.69127600  | -0.77547900 | 0.00029600  |

|                   |             |             |             |
|-------------------|-------------|-------------|-------------|
| H                 | 0.69267700  | -1.43228500 | -0.86941000 |
| H                 | 0.69275700  | -1.43138700 | 0.87067400  |
| C                 | -0.67053700 | -0.10147500 | -0.00000400 |
| O                 | -1.69081500 | -0.75244900 | -0.00018500 |
| N                 | -0.68479100 | 1.25839400  | 0.00001300  |
| H                 | 0.15243500  | 1.80938100  | 0.00065700  |
| H                 | -1.57826900 | 1.71948200  | 0.00012400  |
| (PA) <sub>2</sub> |             |             |             |
| C                 | 4.36650700  | -0.66513000 | 0.00004300  |
| H                 | 4.14660800  | -1.27035600 | 0.87641900  |
| H                 | 5.42643300  | -0.41863600 | 0.00011900  |
| H                 | 4.14667400  | -1.27003500 | -0.87657400 |
| C                 | 3.52380800  | 0.59888400  | 0.00021600  |
| H                 | 3.74286800  | 1.21493600  | 0.87473500  |
| H                 | 3.74322700  | 1.21545400  | -0.87384300 |
| C                 | 2.03416600  | 0.30147200  | -0.00008200 |
| O                 | 1.61105400  | -0.84614600 | 0.00000500  |
| N                 | 1.22235000  | 1.37250600  | -0.00029200 |
| H                 | 1.60681900  | 2.29953100  | -0.00054900 |
| H                 | 0.20830500  | 1.24629000  | -0.00033400 |
| C                 | -4.36651000 | 0.66511800  | 0.00007100  |
| H                 | -4.14651800 | 1.27019900  | 0.87652500  |
| H                 | -5.42643600 | 0.41862200  | 0.00023300  |
| H                 | -4.14676700 | 1.27016900  | -0.87646700 |
| C                 | -3.52380500 | -0.59889200 | 0.00000700  |
| H                 | -3.74308000 | -1.21527300 | 0.87424000  |
| H                 | -3.74300700 | -1.21513700 | -0.87433900 |
| C                 | -2.03416600 | -0.30146900 | 0.00005600  |
| O                 | -1.61106700 | 0.84615400  | 0.00018300  |
| N                 | -1.22234000 | -1.37249500 | -0.00022000 |
| H                 | -1.60680200 | -2.29952300 | 0.00009000  |
| H                 | -0.20829500 | -1.24627000 | -0.00005100 |
| (PA) <sub>3</sub> |             |             |             |
| C                 | -3.43221600 | -3.78506800 | 0.16186100  |
| H                 | -3.76739000 | -3.48987600 | 1.15423000  |
| H                 | -3.46150300 | -4.87090100 | 0.09423300  |
| H                 | -4.13417100 | -3.36931800 | -0.55673100 |
| C                 | -2.02761000 | -3.27144700 | -0.10659600 |
| H                 | -1.30937500 | -3.68770500 | 0.60091400  |
| H                 | -1.68937500 | -3.57327900 | -1.10028400 |
| C                 | -1.93954700 | -1.75791600 | -0.04920800 |
| O                 | -2.94948000 | -1.05693200 | -0.05391700 |
| N                 | -0.70828200 | -1.24124300 | -0.01139300 |
| H                 | 0.13792200  | -1.78944000 | -0.00682200 |
| H                 | 1.43641600  | 1.12098600  | 0.02585900  |
| C                 | -0.03392200 | 4.42290800  | 0.02005000  |
| H                 | 0.49860700  | 4.08049100  | 0.90496000  |
| H                 | -0.05352300 | 5.51069600  | 0.02538800  |
| H                 | 0.52405500  | 4.08957900  | -0.85259600 |
| C                 | -1.44628600 | 3.86372600  | -0.00318600 |
| H                 | -2.01526900 | 4.20321100  | 0.86446600  |
| H                 | -1.98950200 | 4.21119100  | -0.88408800 |
| C                 | -1.47111300 | 2.34540000  | -0.01051000 |



|                                                    |             |             |             |
|----------------------------------------------------|-------------|-------------|-------------|
| O                                                  | -0.43207200 | 1.69189200  | -0.00054300 |
| N                                                  | -2.68010400 | 1.77370400  | -0.02829100 |
| H                                                  | -3.50439800 | 2.34738700  | -0.03689200 |
| H                                                  | -2.78533700 | 0.75063900  | -0.03584600 |
| C                                                  | 4.89584800  | -1.88915600 | -0.07965000 |
| H                                                  | 4.49259400  | -2.50445800 | 0.72088100  |
| H                                                  | 5.98240800  | -1.94028200 | -0.04871800 |
| H                                                  | 4.55235900  | -2.31286300 | -1.02086500 |
| C                                                  | 4.42405200  | -0.45240900 | 0.06339900  |
| H                                                  | 4.76878500  | -0.02223200 | 1.00638900  |
| H                                                  | 4.83266200  | 0.17613700  | -0.73011600 |
| C                                                  | 2.90814100  | -0.33633900 | 0.03306700  |
| O                                                  | 2.18778200  | -1.31735700 | 0.01758500  |
| N                                                  | 2.43125200  | 0.92722500  | 0.03331800  |
| H                                                  | 3.06438600  | 1.70583500  | 0.04373700  |
| H                                                  | -0.59434300 | -0.23262000 | -0.00390100 |
| (PA)(H <sub>2</sub> SO <sub>4</sub> )              |             |             |             |
| C                                                  | -4.08624100 | -0.99498300 | -0.14885100 |
| H                                                  | -3.95073900 | -1.17721800 | -1.21318700 |
| H                                                  | -5.15195900 | -0.98890200 | 0.06763300  |
| H                                                  | -3.62189800 | -1.81553700 | 0.39127900  |
| C                                                  | -3.45835100 | 0.32963700  | 0.25734200  |
| H                                                  | -3.91731700 | 1.16681200  | -0.26903100 |
| H                                                  | -3.60785200 | 0.50983500  | 1.32466200  |
| C                                                  | -1.96525300 | 0.35692800  | 0.02976600  |
| O                                                  | -1.31794600 | -0.69532400 | 0.03069500  |
| N                                                  | -1.39625400 | 1.54946600  | -0.14005900 |
| H                                                  | -1.95373200 | 2.38448900  | -0.12679700 |
| H                                                  | -0.38278700 | 1.62351300  | -0.19837500 |
| S                                                  | 2.05536900  | -0.01747900 | -0.09535200 |
| O                                                  | 1.06064500  | -1.06923700 | -0.57426800 |
| H                                                  | 0.07120500  | -0.86301300 | -0.30016500 |
| O                                                  | 2.19947500  | -0.31922700 | 1.45251700  |
| H                                                  | 2.79310000  | -1.07083200 | 1.57445100  |
| O                                                  | 1.46117800  | 1.28117400  | -0.14036100 |
| O                                                  | 3.30526200  | -0.25804100 | -0.71532900 |
| (PA)(H <sub>2</sub> SO <sub>4</sub> ) <sub>2</sub> |             |             |             |
| C                                                  | -6.02548600 | -0.27570600 | -0.30422600 |
| H                                                  | -5.97884100 | 0.75098700  | 0.05571900  |
| H                                                  | -7.00857900 | -0.68434200 | -0.07332700 |
| H                                                  | -5.90256400 | -0.26830700 | -1.38813100 |
| C                                                  | -4.94184800 | -1.12403300 | 0.36424400  |
| H                                                  | -5.07838000 | -1.11672300 | 1.45013000  |
| H                                                  | -4.98681300 | -2.16314800 | 0.03403500  |
| C                                                  | -3.57098100 | -0.57342300 | 0.11347200  |
| O                                                  | -3.41107300 | 0.67078100  | 0.31773700  |
| N                                                  | -2.60242800 | -1.35836200 | -0.28713100 |
| H                                                  | -2.79398600 | -2.33809600 | -0.42752000 |
| H                                                  | -1.62271100 | -1.03323400 | -0.39161600 |
| S                                                  | 0.05057000  | 1.00389200  | -0.12490500 |
| O                                                  | 1.13310100  | 1.63771100  | -0.82689300 |
| O                                                  | -0.00670300 | -0.45423300 | -0.36417200 |
| O                                                  | 0.26343200  | 1.18826000  | 1.42289900  |

|                                                     |             |             |             |
|-----------------------------------------------------|-------------|-------------|-------------|
| H                                                   | 1.13810300  | 0.79768100  | 1.64040600  |
| O                                                   | -1.26071700 | 1.61186600  | -0.35694600 |
| H                                                   | -2.45338600 | 1.06440400  | 0.06817100  |
| S                                                   | 3.39227900  | -0.57924300 | 0.12135700  |
| O                                                   | 4.61123500  | -1.26519000 | 0.29962600  |
| O                                                   | 2.63386100  | -0.11257400 | 1.25555600  |
| O                                                   | 3.67891100  | 0.64638700  | -0.81071900 |
| H                                                   | 2.85613200  | 1.17593100  | -0.90028400 |
| O                                                   | 2.44364100  | -1.48003900 | -0.73788800 |
| H                                                   | 1.50682100  | -1.17578600 | -0.63544400 |
| (PA)(H <sub>2</sub> SO <sub>4</sub> ) <sub>3</sub>  |             |             |             |
| S                                                   | -3.21276000 | -0.38209600 | 0.32686000  |
| O                                                   | -2.50315300 | 0.02562900  | -0.90253100 |
| O                                                   | -4.45121800 | 0.25321300  | 0.63659300  |
| O                                                   | -3.43883700 | -1.93065200 | 0.27719200  |
| H                                                   | -2.56092900 | -2.40789900 | 0.08796800  |
| O                                                   | -2.22725300 | -0.14943600 | 1.53887200  |
| H                                                   | -1.30602800 | -0.50486100 | 1.30014600  |
| S                                                   | 3.38819400  | -0.01694100 | 0.31926400  |
| O                                                   | 3.62241900  | -1.39283900 | -0.37586700 |
| O                                                   | 4.64085000  | 0.50408100  | 0.75617900  |
| O                                                   | 2.57256500  | 0.81098000  | -0.60153300 |
| H                                                   | 2.09209300  | 2.25034100  | -0.31579200 |
| O                                                   | 2.50459700  | -0.33206700 | 1.58106200  |
| H                                                   | 1.57400700  | -0.62820600 | 1.29426500  |
| S                                                   | 0.06207400  | -2.07152300 | -0.38131900 |
| O                                                   | 0.12717200  | -1.05329600 | 0.73382300  |
| O                                                   | -1.05924500 | -2.99043100 | -0.18790200 |
| O                                                   | -0.23691300 | -1.21873900 | -1.70739500 |
| H                                                   | -1.15858700 | -0.84755800 | -1.60292500 |
| O                                                   | 1.35870000  | -2.68535400 | -0.63171900 |
| H                                                   | 2.74637100  | -1.89103600 | -0.53016200 |
| C                                                   | -2.11639800 | 3.80543500  | -0.27476700 |
| H                                                   | -2.35130600 | 3.51726300  | -1.30645200 |
| H                                                   | -2.67746300 | 4.71922100  | -0.05640500 |
| H                                                   | -2.49197500 | 3.02593900  | 0.39895900  |
| C                                                   | -0.62600800 | 4.06196000  | -0.08005800 |
| H                                                   | -0.27138600 | 4.88456200  | -0.71852200 |
| H                                                   | -0.40471100 | 4.38485800  | 0.94764100  |
| C                                                   | 0.28147800  | 2.90749400  | -0.35339500 |
| O                                                   | 1.55038600  | 3.11557400  | -0.17777400 |
| N                                                   | -0.17211300 | 1.74608600  | -0.75373400 |
| H                                                   | -1.17235800 | 1.53694600  | -0.81867200 |
| H                                                   | 0.47195000  | 0.96414900  | -0.90348800 |
| (PA) <sub>2</sub> (H <sub>2</sub> SO <sub>4</sub> ) |             |             |             |
| C                                                   | 3.94673700  | -2.84770800 | -0.38840800 |
| H                                                   | 3.17821400  | -3.24017100 | 0.27911800  |
| H                                                   | 4.78561000  | -3.54419000 | -0.39723400 |
| H                                                   | 3.52195400  | -2.79057400 | -1.38967800 |
| C                                                   | 4.40503900  | -1.46693500 | 0.06491700  |
| H                                                   | 4.81068600  | -1.49573000 | 1.07938400  |
| H                                                   | 5.20560900  | -1.10023000 | -0.58642300 |
| C                                                   | 3.29136600  | -0.44182800 | -0.00725600 |

|                                                                  |             |             |             |
|------------------------------------------------------------------|-------------|-------------|-------------|
| O                                                                | 2.38088700  | -0.58009500 | -0.82876900 |
| N                                                                | 3.37535300  | 0.59829400  | 0.82671500  |
| H                                                                | 4.12755500  | 0.65871800  | 1.49076700  |
| H                                                                | 2.68362800  | 1.34531500  | 0.78450100  |
| S                                                                | 0.00000500  | 1.69830700  | 0.00006100  |
| O                                                                | -1.19303800 | 2.42374000  | -0.32453000 |
| O                                                                | 1.19312700  | 2.42362400  | 0.32467800  |
| O                                                                | -0.26458900 | 0.74446600  | 1.19145000  |
| H                                                                | -1.14036800 | 0.22736400  | 1.04673500  |
| O                                                                | 0.26444800  | 0.74442100  | -1.19133000 |
| H                                                                | 1.14041700  | 0.22764700  | -1.04698800 |
| C                                                                | -3.94689800 | -2.84765500 | 0.38866100  |
| H                                                                | -3.17810700 | -3.24015600 | -0.27852500 |
| H                                                                | -4.78576800 | -3.54414700 | 0.39722900  |
| H                                                                | -3.52249100 | -2.79045400 | 1.39008700  |
| C                                                                | -4.40503500 | -1.46694900 | -0.06502300 |
| H                                                                | -4.81034700 | -1.49592900 | -1.07962300 |
| H                                                                | -5.20580400 | -1.10007900 | 0.58597000  |
| C                                                                | -3.29131700 | -0.44190000 | 0.00710100  |
| O                                                                | -2.38041200 | -0.58051300 | 0.82808400  |
| N                                                                | -3.37552300 | 0.59845100  | -0.82658500 |
| H                                                                | -4.12859400 | 0.65971900  | -1.48957600 |
| H                                                                | -2.68382000 | 1.34548600  | -0.78423400 |
| (PA) <sub>2</sub> (H <sub>2</sub> SO <sub>4</sub> ) <sub>2</sub> |             |             |             |
| C                                                                | -6.20959600 | 0.35113900  | -1.61354600 |
| H                                                                | -6.33322200 | 1.30948500  | -1.11248700 |
| H                                                                | -7.15559200 | 0.08092900  | -2.07648400 |
| H                                                                | -5.46024300 | 0.47163600  | -2.39098100 |
| C                                                                | -5.78088900 | -0.72635800 | -0.62737300 |
| H                                                                | -6.52336700 | -0.86645200 | 0.15768700  |
| H                                                                | -5.67506000 | -1.68549800 | -1.14002000 |
| C                                                                | -4.43650500 | -0.43784100 | -0.00683600 |
| O                                                                | -3.57280600 | 0.15915600  | -0.66571400 |
| N                                                                | -4.22458500 | -0.86863900 | 1.23193300  |
| H                                                                | -4.94818600 | -1.35736900 | 1.72816500  |
| H                                                                | -3.31144000 | -0.75166400 | 1.66728900  |
| S                                                                | -0.58985100 | -0.17769600 | 0.94420900  |
| O                                                                | -1.24090300 | 0.69495400  | -0.13034700 |
| H                                                                | -2.26413100 | 0.43949000  | -0.30488500 |
| O                                                                | -0.37768700 | -1.54919200 | 0.28161700  |
| H                                                                | 0.48012100  | -1.58093800 | -0.26201800 |
| O                                                                | -1.50684900 | -0.37501300 | 2.02103200  |
| O                                                                | 0.68858800  | 0.40953600  | 1.24196000  |
| S                                                                | 3.11712500  | -1.57738000 | -0.35259900 |
| O                                                                | 3.99338500  | -0.47767500 | -0.91681400 |
| H                                                                | 3.59424600  | 0.50415600  | -0.73249500 |
| O                                                                | 2.88673100  | -1.19493200 | 1.13879300  |
| H                                                                | 2.15957600  | -0.53803600 | 1.24243400  |
| O                                                                | 3.79497000  | -2.81165100 | -0.39144300 |
| O                                                                | 1.81490800  | -1.49389100 | -1.00941600 |
| C                                                                | 1.78307300  | 3.62454600  | 1.17087400  |
| H                                                                | 1.68682100  | 2.82329800  | 1.90002600  |
| H                                                                | 1.26510000  | 4.50362500  | 1.54764000  |

|                                                                  |             |             |             |
|------------------------------------------------------------------|-------------|-------------|-------------|
| H                                                                | 2.83853600  | 3.85994200  | 1.06174900  |
| C                                                                | 1.18662000  | 3.19847500  | -0.16081400 |
| H                                                                | 0.12996100  | 2.94847100  | -0.06132900 |
| H                                                                | 1.25681200  | 4.00428400  | -0.89582200 |
| C                                                                | 1.89262300  | 2.00997000  | -0.75650900 |
| O                                                                | 3.03690000  | 1.70693600  | -0.39041100 |
| N                                                                | 1.25149400  | 1.34253200  | -1.71903100 |
| H                                                                | 0.25831600  | 1.47419200  | -1.81705000 |
| H                                                                | 1.62713300  | 0.45899300  | -2.03632600 |
| (PA) <sub>2</sub> (H <sub>2</sub> SO <sub>4</sub> ) <sub>3</sub> |             |             |             |
| C                                                                | -6.04344100 | 2.64863700  | -0.58812500 |
| H                                                                | -5.88836900 | 2.84764400  | 0.47348100  |
| H                                                                | -6.84253000 | 3.29741000  | -0.94654600 |
| H                                                                | -5.12409700 | 2.89854000  | -1.11640000 |
| C                                                                | -6.40422400 | 1.18626000  | -0.82014800 |
| H                                                                | -7.32566600 | 0.91604000  | -0.29867800 |
| H                                                                | -6.57787900 | 1.00190100  | -1.88569000 |
| C                                                                | -5.29756300 | 0.24692000  | -0.39912000 |
| O                                                                | -4.11999100 | 0.64078900  | -0.41096400 |
| N                                                                | -5.64024100 | -0.98900900 | -0.04681100 |
| H                                                                | -6.60432500 | -1.27622700 | -0.06423100 |
| H                                                                | -4.91710400 | -1.67594300 | 0.16145200  |
| S                                                                | -1.92648100 | -1.94049800 | 0.32790100  |
| O                                                                | -2.04826000 | -0.38916900 | 0.40771400  |
| H                                                                | -2.97108000 | -0.02748500 | 0.03797900  |
| O                                                                | -1.38154300 | -2.20889300 | -1.09399000 |
| H                                                                | -0.42022600 | -1.88345700 | -1.14271700 |
| O                                                                | -3.24020200 | -2.50464600 | 0.38530500  |
| O                                                                | -0.94803100 | -2.32334600 | 1.30256800  |
| S                                                                | 2.02111100  | -1.76188200 | -0.05740300 |
| O                                                                | 2.19679000  | -0.90133700 | 1.11658400  |
| H                                                                | 3.54040500  | -0.18592600 | 1.21966700  |
| O                                                                | 1.53020500  | -3.16365400 | 0.45387000  |
| H                                                                | 0.69001700  | -3.03486400 | 0.94197700  |
| O                                                                | 3.24893200  | -2.03512000 | -0.76555900 |
| O                                                                | 0.94664700  | -1.22354300 | -0.90951200 |
| C                                                                | -1.97648400 | 2.78840100  | 0.99649400  |
| H                                                                | -2.35693100 | 2.42404600  | 0.04025400  |
| H                                                                | -2.69803100 | 3.50545900  | 1.38721200  |
| H                                                                | -1.93716200 | 1.94719800  | 1.69162900  |
| C                                                                | -0.61845900 | 3.46176500  | 0.84628700  |
| H                                                                | -0.66712300 | 4.32946900  | 0.18333600  |
| H                                                                | -0.24624600 | 3.83824400  | 1.80400500  |
| C                                                                | 0.46931400  | 2.59272900  | 0.30148000  |
| O                                                                | 1.58029900  | 3.19404400  | 0.04179800  |
| N                                                                | 0.30277000  | 1.32362400  | 0.10391800  |
| H                                                                | -0.57114300 | 0.84874300  | 0.32857400  |
| H                                                                | 1.04522000  | 0.72543400  | -0.26237400 |
| S                                                                | 4.50161800  | 0.99779500  | -0.26236100 |
| O                                                                | 5.44833200  | 2.04410500  | -0.24120900 |
| O                                                                | 4.40566500  | 0.34767400  | 1.13502600  |
| O                                                                | 3.13429100  | 1.30301000  | -0.68614900 |
| H                                                                | 2.29156900  | 2.55245800  | -0.27223100 |

|                                                                  |             |             |             |
|------------------------------------------------------------------|-------------|-------------|-------------|
| O                                                                | 5.02480900  | -0.12515800 | -1.19406900 |
| H                                                                | 4.40462400  | -0.90393800 | -1.16313400 |
| (PA) <sub>3</sub> (H <sub>2</sub> SO <sub>4</sub> )              |             |             |             |
| C                                                                | -5.79895200 | 2.21916500  | -1.29446900 |
| H                                                                | -5.72899600 | 2.89082900  | -0.43361400 |
| H                                                                | -6.71038400 | 2.46608400  | -1.84542100 |
| H                                                                | -4.93716900 | 2.40585000  | -1.93800700 |
| C                                                                | -5.82164600 | 0.75339700  | -0.85219500 |
| H                                                                | -6.66924200 | 0.55519300  | -0.18668700 |
| H                                                                | -5.95148800 | 0.10398300  | -1.72790600 |
| C                                                                | -4.52374800 | 0.32443000  | -0.18797000 |
| O                                                                | -3.43574100 | 0.73690900  | -0.63863600 |
| N                                                                | -4.60962800 | -0.51251900 | 0.85439100  |
| H                                                                | -5.50605000 | -0.83131100 | 1.18474900  |
| H                                                                | -3.75745900 | -0.87462900 | 1.28867400  |
| S                                                                | -0.82939700 | -0.97932200 | 0.99119300  |
| O                                                                | -1.09306100 | 0.38125000  | 0.21591000  |
| H                                                                | -2.08234000 | 0.46994800  | -0.10269500 |
| O                                                                | -0.71136700 | -2.07362000 | -0.12832700 |
| H                                                                | 0.24050000  | -2.10022300 | -0.58384600 |
| O                                                                | -2.01033500 | -1.30874200 | 1.79255300  |
| O                                                                | 0.45826100  | -0.81623000 | 1.67187200  |
| C                                                                | 4.47592500  | 3.71643000  | 0.15781600  |
| H                                                                | 4.72512500  | 3.19392900  | -0.77009500 |
| H                                                                | 5.40291800  | 4.12854400  | 0.57005100  |
| H                                                                | 3.81988600  | 4.55927200  | -0.09038900 |
| C                                                                | 3.85353500  | -2.51845900 | -1.55650900 |
| H                                                                | 3.60035000  | -3.03325500 | -2.48361000 |
| H                                                                | 4.62977500  | -3.07114700 | -1.02137900 |
| C                                                                | 2.61027300  | -2.33389600 | -0.72809800 |
| O                                                                | 1.49777200  | -2.21747000 | -1.29466900 |
| N                                                                | 2.74880600  | -2.27601600 | 0.60411700  |
| H                                                                | 3.67597700  | -2.20563600 | 0.99435200  |
| H                                                                | 1.97418200  | -1.91385800 | 1.16079100  |
| C                                                                | 3.80533500  | 2.76334100  | 1.15164800  |
| H                                                                | 4.48835900  | 1.93918000  | 1.38214500  |
| H                                                                | 3.60632600  | 3.28891100  | 2.09340400  |
| H                                                                | 4.22800600  | -1.51454900 | -1.78477300 |
| C                                                                | 2.48985600  | 2.17150100  | 0.63709000  |
| H                                                                | 1.97575900  | 1.62194200  | 1.43753800  |
| H                                                                | 1.80050000  | 2.96445100  | 0.32106300  |
| C                                                                | 2.67732300  | 1.17762700  | -0.50702900 |
| O                                                                | 3.75108600  | 0.61488900  | -0.72518800 |
| N                                                                | 1.56608300  | 0.95117200  | -1.26547800 |
| H                                                                | 0.65546800  | 1.17858300  | -0.88556300 |
| H                                                                | 1.59320000  | 0.13150000  | -1.85891400 |
| (PA) <sub>3</sub> (H <sub>2</sub> SO <sub>4</sub> ) <sub>2</sub> |             |             |             |
| C                                                                | -6.29416400 | 1.97035300  | -1.37973600 |
| H                                                                | -6.32352800 | 2.63935600  | -0.52176500 |
| H                                                                | -7.23879900 | 2.05120800  | -1.91247700 |
| H                                                                | -5.49195500 | 2.30064600  | -2.03383400 |
| C                                                                | -6.05981000 | 0.53350700  | -0.93797400 |
| H                                                                | -6.86210800 | 0.17979400  | -0.29025100 |

|                                                                  |             |             |             |
|------------------------------------------------------------------|-------------|-------------|-------------|
| H                                                                | -6.03825800 | -0.13067200 | -1.80534300 |
| C                                                                | -4.73472200 | 0.35418200  | -0.23462400 |
| O                                                                | -3.79402600 | 1.11523400  | -0.48244800 |
| N                                                                | -4.63291500 | -0.65921400 | 0.62454200  |
| H                                                                | -5.42165400 | -1.25568300 | 0.79785600  |
| H                                                                | -3.74078800 | -0.86427800 | 1.07270900  |
| S                                                                | -0.95813200 | -0.18107100 | 0.98998900  |
| O                                                                | -1.54144000 | 1.19147600  | 0.57210200  |
| H                                                                | -2.48738600 | 1.11846600  | 0.13765800  |
| O                                                                | -0.69056500 | -0.89975900 | -0.33759100 |
| H                                                                | 0.03491400  | -0.42315400 | -0.91928800 |
| O                                                                | -1.96682000 | -0.94776200 | 1.66096300  |
| O                                                                | 0.25371900  | 0.11010000  | 1.68023600  |
| S                                                                | 2.42047300  | 0.24592600  | -1.76510500 |
| O                                                                | 2.95543400  | 1.58869900  | -2.01250900 |
| H                                                                | 3.27124400  | 2.37782700  | -0.80492000 |
| O                                                                | 2.86672700  | -0.05011500 | -0.30808200 |
| H                                                                | 2.57003600  | -0.98716900 | -0.00906500 |
| O                                                                | 2.92142400  | -0.77749000 | -2.63562600 |
| O                                                                | 0.94469900  | 0.30448100  | -1.75464600 |
| C                                                                | 3.01894800  | 1.50628900  | 2.77679300  |
| H                                                                | 2.52387800  | 0.58370500  | 2.48482600  |
| H                                                                | 3.06366500  | 1.55503100  | 3.86202900  |
| H                                                                | 4.03135700  | 1.50639300  | 2.38115400  |
| C                                                                | 2.23806000  | 2.71474500  | 2.24708500  |
| H                                                                | 1.21916600  | 2.71635900  | 2.62694200  |
| H                                                                | 2.72849700  | 3.64320600  | 2.54221500  |
| C                                                                | 2.21255700  | 2.68304400  | 0.75859400  |
| O                                                                | 3.33294400  | 2.77954000  | 0.14822900  |
| N                                                                | 1.08808300  | 2.55336900  | 0.11253500  |
| H                                                                | 0.23721200  | 2.32336800  | 0.60987600  |
| H                                                                | 1.08162500  | 2.40187100  | -0.89071900 |
| C                                                                | 0.29803000  | -3.81635700 | 1.94091600  |
| H                                                                | 1.26661800  | -4.13619300 | 2.31876000  |
| H                                                                | -0.47439200 | -4.44602000 | 2.37737400  |
| H                                                                | 0.13596800  | -2.79100100 | 2.26581400  |
| C                                                                | 0.25415100  | -3.90526100 | 0.42474800  |
| H                                                                | 0.41344900  | -4.92766800 | 0.07659000  |
| H                                                                | -0.72105600 | -3.58722100 | 0.04978400  |
| C                                                                | 1.28060100  | -3.01207100 | -0.23310900 |
| O                                                                | 2.01572100  | -2.29279500 | 0.44441700  |
| N                                                                | 1.33672100  | -3.04258900 | -1.56958800 |
| H                                                                | 0.66223600  | -3.57686500 | -2.08725100 |
| H                                                                | 1.95493100  | -2.41339200 | -2.07574700 |
| (PA) <sub>3</sub> (H <sub>2</sub> SO <sub>4</sub> ) <sub>3</sub> |             |             |             |
| C                                                                | -2.91860600 | 1.96674900  | 2.01248500  |
| H                                                                | -2.69861800 | 0.90575100  | 2.11143600  |
| H                                                                | -3.74815900 | 2.20328000  | 2.67416100  |
| H                                                                | -2.04743600 | 2.53539300  | 2.32962800  |
| C                                                                | -3.29739100 | 2.32270400  | 0.57297900  |
| H                                                                | -4.13509500 | 1.73016600  | 0.21269000  |
| H                                                                | -3.58090500 | 3.37594500  | 0.51548700  |
| C                                                                | -2.14415600 | 2.15860300  | -0.36241000 |

|                   |             |             |             |
|-------------------|-------------|-------------|-------------|
| O                 | -1.07077300 | 2.79036300  | -0.04513300 |
| N                 | -2.25320100 | 1.42987700  | -1.43147000 |
| H                 | -3.11859000 | 0.87438500  | -1.56346800 |
| H                 | -1.48916000 | 1.34836400  | -2.10656300 |
| S                 | 1.06442900  | 0.78991100  | -1.94798100 |
| O                 | 1.08796400  | 1.85628900  | -0.93499200 |
| H                 | -0.22210400 | 2.46158200  | -0.50943300 |
| O                 | 2.48920300  | 0.60329800  | -2.47529000 |
| H                 | 3.04349700  | -0.00029700 | -1.85059000 |
| O                 | 0.19961300  | 1.10289900  | -3.04589500 |
| O                 | 0.71427000  | -0.49370800 | -1.28361100 |
| S                 | 3.34734100  | -2.17118500 | -0.41992100 |
| O                 | 2.57688000  | -2.02438400 | 0.84090800  |
| H                 | 1.25079900  | -2.32240200 | 1.03840300  |
| O                 | 2.31559400  | -2.67630400 | -1.48617900 |
| H                 | 1.59872800  | -2.01578300 | -1.58104200 |
| O                 | 4.37855200  | -3.13597600 | -0.35781500 |
| O                 | 3.77624100  | -0.83013700 | -0.85719900 |
| S                 | -0.45107600 | -1.23179400 | 1.85013300  |
| O                 | 0.53244600  | -0.50902500 | 2.63607200  |
| H                 | 0.86347900  | 1.04469000  | 2.48342100  |
| O                 | -0.83340100 | -0.33061700 | 0.64466100  |
| H                 | -0.16696900 | -0.40021000 | -0.14935900 |
| O                 | -1.66518800 | -1.58518400 | 2.49327200  |
| O                 | 0.20505000  | -2.44783900 | 1.23539500  |
| C                 | 4.01367300  | 2.97947800  | 0.04984400  |
| H                 | 4.87326900  | 2.48536200  | 0.50215400  |
| H                 | 4.34247700  | 3.95714800  | -0.29188800 |
| H                 | 3.69029100  | 2.41147800  | -0.82226500 |
| C                 | 2.87072800  | 3.13942300  | 1.03889400  |
| H                 | 3.17560800  | 3.70365300  | 1.92343600  |
| H                 | 2.03488000  | 3.67977300  | 0.59717100  |
| C                 | 2.30477400  | 1.85768200  | 1.54427900  |
| O                 | 1.22622600  | 1.94769000  | 2.24659200  |
| N                 | 2.88022400  | 0.71992000  | 1.32359700  |
| H                 | 3.63893100  | 0.63430000  | 0.65730600  |
| H                 | 2.47801000  | -0.16753800 | 1.62198400  |
| C                 | -7.13080900 | -1.11531900 | -1.14942200 |
| H                 | -7.38220000 | -0.17807600 | -0.65614600 |
| H                 | -8.00181100 | -1.76569300 | -1.11642000 |
| H                 | -6.89701300 | -0.89282600 | -2.18715600 |
| C                 | -5.94487700 | -1.78303400 | -0.47084800 |
| H                 | -6.15746100 | -2.01263500 | 0.57359900  |
| H                 | -5.71230500 | -2.73307000 | -0.95793300 |
| C                 | -4.68791200 | -0.94614600 | -0.55198800 |
| O                 | -4.53656100 | -0.10026300 | -1.43084400 |
| N                 | -3.75056900 | -1.18305800 | 0.37781600  |
| H                 | -3.86271100 | -1.88344800 | 1.09123100  |
| H                 | -2.83718500 | -0.75504600 | 0.31244000  |
| (MA) <sub>2</sub> |             |             |             |
| N                 | -1.28495300 | -0.67081400 | 0.05783400  |
| H                 | -1.65269000 | -1.46122500 | 0.57096800  |
| H                 | -0.50756200 | -0.29279100 | 0.58967000  |

|   |             |             |             |
|---|-------------|-------------|-------------|
| C | -2.31314600 | 0.35126900  | -0.10870900 |
| H | -1.88363400 | 1.20503500  | -0.63143600 |
| H | -3.11867200 | -0.03648000 | -0.73052300 |
| H | -2.75022900 | 0.71840500  | 0.82536100  |
| N | 1.43822200  | 0.75878900  | 0.18125000  |
| H | 0.98281700  | 1.12514600  | -0.64572000 |
| H | 2.09614000  | 1.46223200  | 0.49082000  |
| C | 2.12694100  | -0.49100900 | -0.14213800 |
| H | 2.58312400  | -0.89223000 | 0.76111400  |
| H | 1.39020200  | -1.21100700 | -0.49434800 |
| H | 2.90485200  | -0.39446700 | -0.90441700 |

(MA)<sub>3</sub>

|   |             |             |             |
|---|-------------|-------------|-------------|
| N | 0.87938800  | -1.26606900 | -0.42623700 |
| H | 0.15217900  | -1.07840400 | 0.26236900  |
| H | 0.58200300  | -2.07946700 | -0.95036900 |
| C | 2.16135600  | -1.52525600 | 0.22378900  |
| H | 2.92934300  | -1.68647400 | -0.53122800 |
| H | 2.45258900  | -0.64891100 | 0.80099500  |
| H | 2.16106800  | -2.38679300 | 0.89825400  |
| N | 0.12082900  | 1.74472700  | -0.71613700 |
| H | 0.35370000  | 0.84007000  | -1.11780500 |
| H | 0.26152600  | 2.44837000  | -1.42919900 |
| C | 1.00650900  | 1.98104200  | 0.42118400  |
| H | 0.78345700  | 2.94857700  | 0.86906300  |
| H | 0.81765500  | 1.21709100  | 1.17626600  |
| H | 2.07321100  | 1.95459800  | 0.17757900  |
| N | -1.74664000 | -0.14217500 | 0.80375200  |
| H | -2.35799400 | -0.04939800 | 1.60394300  |
| H | -1.43874300 | 0.78602800  | 0.52605300  |
| C | -2.45001800 | -0.75837400 | -0.31861100 |
| H | -1.78207000 | -0.77468600 | -1.17980300 |
| H | -2.70446800 | -1.78955700 | -0.07536400 |
| H | -3.36558000 | -0.24088900 | -0.61857500 |

(MA)(H<sub>2</sub>SO<sub>4</sub>)

|   |             |             |             |
|---|-------------|-------------|-------------|
| S | -0.87927900 | 0.12549400  | 0.01780300  |
| O | -1.60261000 | 1.33475500  | -0.21168700 |
| O | -1.97098600 | -1.03211700 | 0.15077400  |
| O | -0.04618400 | -0.28211100 | -1.14231900 |
| O | -0.10472400 | 0.02198200  | 1.23271400  |
| N | 2.16900600  | -0.72222300 | -0.04281700 |
| C | 2.80263100  | 0.61331100  | 0.02306500  |
| H | -2.77280900 | -0.73550000 | -0.29362800 |
| H | 1.22127900  | -0.62520000 | -0.65038000 |
| H | 1.80435700  | -0.98341500 | 0.87409600  |
| H | 3.07714200  | 0.91949000  | -0.98117100 |
| H | 3.67992100  | 0.59318200  | 0.66242100  |
| H | 2.06205400  | 1.29815600  | 0.42444500  |
| H | 2.79372700  | -1.43900500 | -0.39515900 |

(MA)(H<sub>2</sub>SO<sub>4</sub>)<sub>2</sub>



|   |             |             |             |
|---|-------------|-------------|-------------|
| S | 1.63540400  | -0.78361200 | -0.03130000 |
| O | 2.38602500  | 0.09878500  | -0.90543400 |
| O | 0.99577500  | -0.05814900 | 1.05619300  |
| O | 2.68892800  | -1.69326500 | 0.71714500  |
| O | 0.74921600  | -1.68301800 | -0.74013700 |
| H | 1.58474400  | 1.58689500  | -0.88450800 |
| H | 3.07804100  | -2.31737300 | 0.09141200  |
| S | -2.17037100 | -0.10078000 | -0.01189100 |
| O | -1.57883300 | -0.26612500 | 1.40880600  |
| O | -3.56774400 | 0.03610100  | 0.09776200  |
| O | -1.86766400 | -1.44188100 | -0.71268000 |
| O | -1.42190800 | 0.93583700  | -0.68468600 |
| H | -0.58037500 | -0.23200700 | 1.37412200  |
| H | -0.88359800 | -1.58427000 | -0.79548200 |
| N | 0.88874400  | 2.34545000  | -0.69220000 |
| H | -0.02770400 | 1.85208200  | -0.61369900 |
| C | 1.22376900  | 3.06082400  | 0.56315200  |
| H | 2.18246100  | 3.55574600  | 0.44787800  |
| H | 1.28010200  | 2.31953300  | 1.35283000  |
| H | 0.44820900  | 3.78792500  | 0.77985400  |
| H | 0.84341100  | 2.97236400  | -1.49060900 |

(MA)(H<sub>2</sub>SO<sub>4</sub>)<sub>3</sub>

|   |             |             |             |
|---|-------------|-------------|-------------|
| S | -1.16034400 | 1.88839900  | -0.17379900 |
| O | -1.96503800 | 1.24939100  | 0.86340900  |
| O | 0.22888500  | 2.01268200  | 0.23105000  |
| O | -1.76205300 | 3.34364000  | -0.21722200 |
| O | -1.33387100 | 1.32740000  | -1.49421300 |
| H | 0.98612100  | 0.18200000  | 1.79148100  |
| H | -1.40414300 | 3.82587400  | -0.97401500 |
| S | -1.57025100 | -1.78844600 | -0.45930700 |
| O | -2.75370500 | -1.19277000 | 0.33920300  |
| O | -0.35884500 | -1.20724700 | 0.09328600  |
| O | -1.74020700 | -1.24182900 | -1.88982500 |
| O | -1.70695800 | -3.18801800 | -0.48726800 |
| H | -2.59271200 | -0.22780000 | 0.53303600  |
| H | -1.57471800 | -0.25952500 | -1.89097400 |
| N | 0.21386500  | 0.23055800  | 2.49298800  |
| H | -0.64634700 | 0.45628500  | 1.97590900  |
| C | 0.11759400  | -1.05370700 | 3.22784500  |
| H | 1.06852400  | -1.24850500 | 3.71232700  |
| H | -0.09251000 | -1.83156400 | 2.50213900  |
| H | -0.67841800 | -0.99469200 | 3.96264000  |
| S | 2.85818600  | -0.14477200 | -0.35723200 |

|   |            |             |             |
|---|------------|-------------|-------------|
| O | 4.22047800 | -0.30856000 | -0.66838600 |
| O | 2.35085300 | 1.14172100  | -1.04698600 |
| O | 2.44576700 | -0.10173300 | 1.02593500  |
| H | 1.52388900 | 1.48868600  | -0.61699500 |
| O | 2.07375500 | -1.28845000 | -1.04822400 |
| H | 1.15952100 | -1.35007400 | -0.68342200 |
| H | 0.41421200 | 1.01494200  | 3.10922300  |

(MA)<sub>2</sub>(H<sub>2</sub>SO<sub>4</sub>)

|   |             |             |             |
|---|-------------|-------------|-------------|
| S | 0.02252800  | -0.56672600 | 0.08553300  |
| O | -0.48276200 | 0.89009000  | 0.18714000  |
| O | -1.10046100 | -1.41466500 | -0.16980800 |
| O | 0.84899100  | -0.81881900 | 1.22543100  |
| O | 0.91227600  | -0.56606000 | -1.17282800 |
| H | -1.45249900 | 0.95561400  | -0.21594200 |
| H | 1.90521300  | -0.36393900 | -0.89526700 |
| N | 3.23696300  | -0.01052900 | -0.22183200 |
| C | 3.11540000  | 1.38855200  | 0.21138800  |
| H | 3.20027600  | -0.62807200 | 0.58284500  |
| H | 3.10543900  | 2.03207100  | -0.66505400 |
| H | 2.16636100  | 1.50258300  | 0.73071500  |
| H | 3.92231300  | 1.70221900  | 0.87326600  |
| N | -2.90217200 | 0.78931900  | -0.67031100 |
| C | -3.67473600 | 0.47622600  | 0.54044500  |
| H | -2.82835800 | -0.03761300 | -1.25417800 |
| H | -3.69010400 | 1.34924400  | 1.18839300  |
| H | -4.69987900 | 0.17517400  | 0.32574500  |
| H | -3.16806000 | -0.33297300 | 1.06012200  |
| H | -3.33911900 | 1.52438400  | -1.21167600 |
| H | 4.10609000  | -0.17564900 | -0.71298300 |

(MA)<sub>2</sub>(H<sub>2</sub>SO<sub>4</sub>)<sub>2</sub>

|   |             |             |             |
|---|-------------|-------------|-------------|
| S | -2.11272000 | 0.07281000  | -0.48724900 |
| O | -1.43765200 | -0.10670800 | 0.83847400  |
| O | -1.14098200 | -0.68268300 | -1.49822100 |
| O | -3.33760300 | -0.64884900 | -0.57409200 |
| O | -2.10394800 | 1.46860300  | -0.84722700 |
| H | -0.88898900 | -1.66992100 | 0.80616100  |
| N | -0.05380200 | 2.22501600  | 0.84236300  |
| H | -0.52187000 | 1.30063900  | 1.01086700  |
| H | 0.92628500  | 2.13230400  | 1.13329700  |
| O | 1.99307600  | -1.31298700 | 0.12834200  |
| O | 2.45827000  | 0.95896700  | 0.89545100  |
| S | 2.20196600  | 0.07463300  | -0.22051100 |
| O | 1.17857400  | 0.61132500  | -1.11255100 |

|   |             |             |             |
|---|-------------|-------------|-------------|
| O | 3.54541200  | 0.01110500  | -1.06507300 |
| H | 3.85392700  | 0.90813400  | -1.23792800 |
| H | -0.27063700 | -0.21928200 | -1.50872500 |
| H | 0.54110300  | -2.17688500 | 0.18297400  |
| N | -0.39119300 | -2.53915200 | 0.47758600  |
| C | -0.26846700 | -3.57597400 | 1.51994900  |
| C | -0.81790100 | 3.32091900  | 1.46861900  |
| H | -1.82345600 | 3.29183200  | 1.06080400  |
| H | -0.34737400 | 4.27285800  | 1.24502500  |
| H | -0.84531000 | 3.16623100  | 2.54210300  |
| H | -1.25686200 | -3.86691700 | 1.86010100  |
| H | 0.25566100  | -4.43745400 | 1.11912300  |
| H | 0.29853200  | -3.16112200 | 2.34692900  |
| H | -0.89406800 | -2.85111600 | -0.35085700 |
| H | -0.06289900 | 2.29070400  | -0.17758100 |

(MA)<sub>2</sub>(H<sub>2</sub>SO<sub>4</sub>)<sub>3</sub>

|   |             |             |             |
|---|-------------|-------------|-------------|
| N | 0.05440400  | -2.03780700 | -0.13473700 |
| H | -0.81833400 | -2.30447700 | -0.61143900 |
| H | 0.87421100  | -2.12201200 | -0.74061100 |
| N | -2.19003900 | 1.95735800  | 1.31859900  |
| H | -3.16652000 | 2.23637900  | 1.26393900  |
| H | -2.16942500 | 0.91857200  | 1.33262900  |
| S | -3.03125700 | -0.90144700 | -0.24308300 |
| O | -2.63143700 | -2.09130000 | -0.95949200 |
| O | -2.86152400 | 0.34658800  | -0.96452800 |
| O | -2.44974200 | -0.83151300 | 1.09375500  |
| H | -1.31111600 | 0.47628300  | -1.73168700 |
| S | 0.31644100  | 1.48851300  | -0.84936400 |
| O | -0.33498900 | 0.50960200  | -1.88698600 |
| O | 1.63494000  | 1.75151700  | -1.35374800 |
| O | -0.55417700 | 2.63826400  | -0.73343700 |
| O | 0.33795600  | 0.73542400  | 0.43027800  |
| H | -0.01292300 | -1.02851100 | 0.07483000  |
| H | -1.71212200 | 2.25145300  | 0.43503200  |
| O | -4.60495000 | -0.98851500 | -0.06027200 |
| H | -4.85111900 | -1.89538000 | 0.15871200  |
| S | 3.53944200  | -0.55683500 | 0.19979200  |
| O | 3.94418300  | 0.66041400  | -0.66154900 |
| O | 2.70415600  | 0.06383200  | 1.36015600  |
| O | 4.71004200  | -1.10679000 | 0.76033700  |
| O | 2.65889900  | -1.39151700 | -0.56966300 |
| H | 3.13485600  | 1.09374900  | -1.03886600 |
| H | 1.81257800  | 0.36525100  | 1.03075100  |

|   |             |             |            |
|---|-------------|-------------|------------|
| C | 0.25123600  | -2.78501200 | 1.12858800 |
| H | 0.32534000  | -3.84515000 | 0.91143700 |
| H | -0.60105700 | -2.58578900 | 1.76981400 |
| H | 1.17051900  | -2.43562600 | 1.58889300 |
| C | -1.48661000 | 2.54295100  | 2.48144800 |
| H | -1.53191500 | 3.62510600  | 2.41915400 |
| H | -0.45340100 | 2.21577800  | 2.43320300 |
| H | -1.94876200 | 2.19815500  | 3.40064700 |

(MA)<sub>3</sub>(H<sub>2</sub>SO<sub>4</sub>)

|   |             |             |             |
|---|-------------|-------------|-------------|
| S | -0.60611700 | -0.47495300 | -0.57812900 |
| O | -0.76625000 | 1.03404500  | -0.12096500 |
| O | -1.80465400 | -0.82228100 | -1.29094500 |
| O | -0.45537400 | -1.24255800 | 0.67661500  |
| O | 0.62918000  | -0.48541700 | -1.33173800 |
| H | -1.75615100 | 1.22220200  | 0.02656000  |
| H | 2.29814900  | -0.12001100 | 0.74090500  |
| C | 2.76411800  | -2.10703900 | 0.23005100  |
| H | 3.83953300  | -1.95282700 | 0.22961900  |
| H | 2.35985100  | -1.97590700 | -0.76857700 |
| H | 2.53417500  | -3.10576600 | 0.58887800  |
| N | 2.10698000  | -1.10588300 | 1.09589400  |
| H | 1.03251600  | -1.21432100 | 1.02719400  |
| N | -3.39420600 | 1.12003600  | 0.13973700  |
| C | -3.67373700 | 0.20459200  | 1.25251600  |
| H | -3.51152000 | 0.62978300  | -0.74175700 |
| H | -3.49575200 | 0.71966800  | 2.19424800  |
| H | -4.69503800 | -0.17925900 | 1.25020500  |
| H | -2.98318100 | -0.63391700 | 1.18676500  |
| N | 2.30056100  | 1.43947000  | -0.05010700 |
| C | 3.20573800  | 2.57071500  | 0.14998100  |
| H | 2.29649200  | 1.12642700  | -1.01582600 |
| H | 3.17208500  | 2.88368500  | 1.19185400  |
| H | 4.22700400  | 2.26630500  | -0.07115400 |
| H | 2.96558100  | 3.43515700  | -0.47212200 |
| H | -4.01461000 | 1.91875500  | 0.14974400  |
| H | 1.33249200  | 1.70806500  | 0.11275200  |
| H | 2.40297100  | -1.18406700 | 2.06308600  |

(MA)<sub>3</sub>(H<sub>2</sub>SO<sub>4</sub>)<sub>2</sub>

|   |            |             |             |
|---|------------|-------------|-------------|
| S | 0.84453500 | -1.74941600 | -0.08299400 |
| O | 0.20412300 | -1.00735500 | 1.01106500  |
| N | 1.44070900 | 1.48266500  | 0.89992600  |
| H | 0.86162300 | 0.66443000  | 1.16243000  |
| O | 2.13179800 | -2.29465700 | 0.23431500  |

|                                                                  |             |             |             |
|------------------------------------------------------------------|-------------|-------------|-------------|
| O                                                                | 1.16639800  | -0.65471900 | -1.18486600 |
| N                                                                | 3.83616600  | 0.21486100  | 0.19445500  |
| H                                                                | 2.39442500  | 1.08828200  | 0.63232200  |
| N                                                                | -2.33339000 | -1.92644600 | 0.60492300  |
| H                                                                | -2.45705800 | -0.96441600 | 0.20614300  |
| S                                                                | -1.72279500 | 1.57353200  | -0.37179600 |
| O                                                                | -0.55109200 | 1.40162000  | -1.22996200 |
| O                                                                | -1.39876200 | 1.91410500  | 0.98275900  |
| O                                                                | -2.67984900 | 0.48936700  | -0.53351000 |
| H                                                                | 0.40658700  | -0.03908100 | -1.30409100 |
| O                                                                | -0.09881700 | -2.69009600 | -0.67228700 |
| H                                                                | 3.46110100  | -0.73395900 | 0.21350400  |
| H                                                                | 4.63635900  | 0.22735700  | 0.81510700  |
| H                                                                | 0.97127100  | 1.85620600  | 0.07064500  |
| H                                                                | -1.93393100 | -1.80064300 | 1.53293100  |
| H                                                                | -1.56310600 | -2.36892700 | 0.04105600  |
| O                                                                | -2.46209200 | 2.87004200  | -0.92514900 |
| H                                                                | -2.75645100 | 2.70091600  | -1.82795000 |
| C                                                                | 4.24482900  | 0.55826300  | -1.17274500 |
| C                                                                | 1.51745300  | 2.47703900  | 1.98571400  |
| C                                                                | -3.59316600 | -2.68991100 | 0.59746900  |
| H                                                                | -4.34095200 | -2.16551000 | 1.18386300  |
| H                                                                | -3.42552500 | -3.67984700 | 1.00982500  |
| H                                                                | -3.93756100 | -2.77728700 | -0.42777300 |
| H                                                                | 0.51194600  | 2.80468200  | 2.22748400  |
| H                                                                | 1.98083200  | 2.01458200  | 2.85189300  |
| H                                                                | 2.11973200  | 3.32059100  | 1.66193800  |
| H                                                                | 3.36895200  | 0.51881600  | -1.81590400 |
| H                                                                | 4.99662900  | -0.11907200 | -1.58040800 |
| H                                                                | 4.64455500  | 1.57068000  | -1.19306400 |
| (MA) <sub>3</sub> (H <sub>2</sub> SO <sub>4</sub> ) <sub>3</sub> |             |             |             |
| S                                                                | 2.56371400  | -1.20328200 | 0.02749300  |
| O                                                                | 2.64008700  | -0.58816900 | -1.27738400 |
| O                                                                | 3.90219400  | -2.06144600 | 0.11385500  |
| O                                                                | 2.66500700  | -0.22880900 | 1.10648200  |
| H                                                                | 3.87565500  | -2.62061100 | 0.89993900  |
| S                                                                | -2.92934100 | -0.77171100 | -0.16872700 |
| O                                                                | -1.76867400 | -1.50146600 | 0.38916100  |
| O                                                                | -3.43451500 | 0.15456600  | 1.01882200  |
| O                                                                | -2.50876300 | 0.13492000  | -1.24760200 |
| H                                                                | -2.79074000 | 0.88161800  | 1.19104900  |
| S                                                                | -0.59956400 | 2.17392400  | 0.20799900  |
| O                                                                | 0.22893400  | 3.37067800  | 0.33720700  |

|   |             |             |             |
|---|-------------|-------------|-------------|
| O | -1.40945600 | 1.92633300  | 1.40270500  |
| O | 0.15909600  | 0.95731100  | -0.18263300 |
| O | -1.56435600 | 2.49436700  | -0.96093900 |
| H | -2.08992800 | 1.67816100  | -1.13380200 |
| O | 1.45867200  | -2.11888500 | 0.21710300  |
| N | 2.68013900  | 2.34656500  | -0.06318400 |
| N | -0.06003000 | -1.35097800 | -1.69826000 |
| N | -0.05881100 | -0.59642800 | 2.16342000  |
| H | -0.56095000 | -0.44914700 | -1.59402200 |
| H | -0.14468300 | -1.74714300 | -0.75667700 |
| H | 0.92995200  | -1.13836400 | -1.89250600 |
| H | -0.75293700 | -0.96383200 | 1.44315200  |
| H | -0.52725300 | 0.23433900  | 2.53332900  |
| H | 0.81732300  | -0.31837200 | 1.72620100  |
| H | 1.79102100  | 2.84628000  | 0.19182000  |
| H | 2.61754600  | 1.37695400  | 0.27073100  |
| H | 3.47065100  | 2.78966100  | 0.39612700  |
| O | -4.01179100 | -1.61334400 | -0.53309000 |
| C | -0.72565000 | -2.31488400 | -2.65375600 |
| C | 2.79634700  | 2.36722200  | -1.53122800 |
| C | 0.18663100  | -1.66096100 | 3.15901200  |
| H | -1.76430300 | -2.48561000 | -2.34069600 |
| H | -0.18784500 | -3.26068500 | -2.63530100 |
| H | -0.71046200 | -1.88680100 | -3.65621600 |
| H | 1.89583100  | 1.90828600  | -1.92326400 |
| H | 3.66161200  | 1.78787100  | -1.83126500 |
| H | 2.87354100  | 3.39810900  | -1.86200700 |
| H | -0.77373500 | -1.99168700 | 3.55175700  |
| H | 0.80802800  | -1.28333700 | 3.96604900  |
| H | 0.68022100  | -2.48941900 | 2.65987600  |

(DMA)<sub>2</sub>

|   |             |             |             |
|---|-------------|-------------|-------------|
| N | 1.55417900  | -0.00019600 | -0.09426000 |
| H | 0.83934000  | -0.00043300 | 0.62399800  |
| H | -0.83939800 | -0.00045200 | -0.62411600 |
| N | -1.55416900 | -0.00019900 | 0.09420800  |
| C | -2.35843100 | 1.20410100  | -0.00791400 |
| C | -2.35928600 | -1.20393100 | -0.00787200 |
| C | 2.35846000  | 1.20408500  | 0.00793400  |
| C | 2.35925600  | -1.20394700 | 0.00789200  |
| H | 1.71664300  | -2.08248900 | -0.00436200 |
| H | 2.97799700  | -1.23692400 | 0.91511700  |
| H | 3.02798500  | -1.26413800 | -0.85170200 |

|   |             |             |             |
|---|-------------|-------------|-------------|
| H | 3.02717300  | 1.26473500  | -0.85164100 |
| H | 2.97715600  | 1.23744800  | 0.91517700  |
| H | 1.71526800  | 2.08220300  | -0.00431700 |
| H | -3.02794400 | -1.26410000 | 0.85177800  |
| H | -2.97810200 | -1.23689600 | -0.91504600 |
| H | -1.71669300 | -2.08248900 | 0.00433400  |
| H | -2.97719700 | 1.23748400  | -0.91510800 |
| H | -3.02707500 | 1.26475800  | 0.85171300  |
| H | -1.71521900 | 2.08220500  | 0.00429300  |

(DMA)<sub>3</sub>

|   |             |             |             |
|---|-------------|-------------|-------------|
| N | 0.57141300  | 1.71723900  | -0.00419400 |
| H | -0.34443500 | 1.27134100  | 0.00515600  |
| H | 1.26787600  | -0.33891800 | -0.02366500 |
| N | 1.20049700  | -1.35531300 | -0.01279100 |
| C | 1.81071000  | -1.90465400 | -1.20961200 |
| C | 1.80626800  | -1.87532700 | 1.19936200  |
| C | 0.71372600  | 2.52822800  | -1.19945100 |
| C | 0.75453900  | 2.49252500  | 1.20909400  |
| H | 0.56887000  | 1.86500500  | 2.07975000  |
| H | 0.09376900  | 3.36836900  | 1.26670000  |
| H | 1.78404400  | 2.84984500  | 1.26483000  |
| H | 1.74001500  | 2.89068400  | -1.27718100 |
| H | 0.04929700  | 3.40311900  | -1.21018400 |
| H | 0.50228800  | 1.92592000  | -2.08190700 |
| H | 1.60861800  | -2.94558700 | 1.27851200  |
| H | 2.89516200  | -1.73341200 | 1.23427800  |
| H | 1.36849100  | -1.38744400 | 2.06920200  |
| H | 2.89935500  | -1.76100800 | -1.24519800 |
| H | 1.61617900  | -2.97714000 | -1.26131600 |
| H | 1.37413200  | -1.44118600 | -2.09321500 |
| N | -1.77433000 | -0.36292000 | 0.00573900  |
| H | -0.92854900 | -0.93046900 | -0.00318100 |
| C | -2.54461300 | -0.60541300 | -1.20007200 |
| C | -2.53873400 | -0.63475500 | 1.20906800  |
| H | -1.91377500 | -0.46192700 | -2.07630100 |
| H | -2.97269200 | -1.61633300 | -1.24392900 |
| H | -3.36957700 | 0.10643300  | -1.25883000 |
| H | -3.36274600 | 0.07603500  | 1.28975800  |
| H | -2.96748200 | -1.64613800 | 1.22978400  |
| H | -1.90327400 | -0.51386600 | 2.08532200  |

(DMA)(H<sub>2</sub>SO<sub>4</sub>)

|   |             |             |            |
|---|-------------|-------------|------------|
| H | 1.50177100  | -0.28871300 | 1.08036000 |
| S | -1.26728500 | -0.17446800 | 0.04950300 |

|   |             |             |             |
|---|-------------|-------------|-------------|
| O | -1.68973800 | 1.32512100  | -0.34652900 |
| O | -0.33414200 | -0.58684600 | -1.02020500 |
| O | -2.47301800 | -0.93589500 | 0.07805600  |
| O | -0.55359700 | 0.01427600  | 1.29369700  |
| H | -2.46930300 | 1.27350500  | -0.91061400 |
| N | 1.89016600  | -0.11206500 | 0.15014300  |
| H | 1.04004800  | -0.40415300 | -0.47173600 |
| C | 3.10067500  | -0.90093100 | -0.11984000 |
| H | 3.90204600  | -0.59322600 | 0.54772700  |
| H | 3.40249000  | -0.73440600 | -1.15034200 |
| H | 2.87989900  | -1.95369300 | 0.02683100  |
| C | 2.05459400  | 1.34587300  | -0.01688500 |
| H | 2.81894500  | 1.71345300  | 0.66340600  |
| H | 1.09786600  | 1.81497500  | 0.19664000  |
| H | 2.34397500  | 1.54530800  | -1.04513000 |

(DMA)(H<sub>2</sub>SO<sub>4</sub>)<sub>2</sub>

|   |             |             |             |
|---|-------------|-------------|-------------|
| S | 1.41894300  | -1.24254400 | -0.10523600 |
| O | 2.26665900  | -0.34101700 | -0.84585700 |
| O | 0.87917800  | -0.61387600 | 1.10411000  |
| O | 2.41316000  | -2.37351300 | 0.37375900  |
| O | 0.39019200  | -1.91454500 | -0.87271200 |
| H | 1.76784800  | 1.27379700  | -0.41944600 |
| H | 1.90968100  | -3.14257900 | 0.66842400  |
| S | -2.23151600 | 0.02605600  | 0.02736100  |
| O | -1.69541200 | -0.56516400 | 1.35193800  |
| O | -3.59439100 | 0.34427200  | 0.18837800  |
| O | -2.12517400 | -1.13963300 | -0.98073400 |
| O | -1.32058200 | 1.06811300  | -0.38960200 |
| H | -0.69222000 | -0.63037200 | 1.32633300  |
| H | -1.18361500 | -1.45972200 | -1.04293800 |
| N | 1.17770100  | 2.05440100  | -0.06994200 |
| H | 0.23850100  | 1.62082500  | 0.02260900  |
| C | 1.08211400  | 3.12715100  | -1.08029600 |
| H | 2.06658300  | 3.55721300  | -1.24201200 |
| H | 0.39576000  | 3.88805400  | -0.71967900 |
| H | 0.70073300  | 2.69912900  | -2.00196300 |
| C | 1.66754200  | 2.49855500  | 1.25080900  |
| H | 2.65684900  | 2.93247500  | 1.13455400  |
| H | 1.70857900  | 1.63202700  | 1.90279600  |
| H | 0.98159300  | 3.24082500  | 1.64958000  |

(DMA)(H<sub>2</sub>SO<sub>4</sub>)<sub>3</sub>

|   |             |            |             |
|---|-------------|------------|-------------|
| S | -1.11009200 | 1.71626000 | -0.82091100 |
| O | -1.88867900 | 1.48919200 | 0.39232600  |



|   |             |             |             |
|---|-------------|-------------|-------------|
| O | 0.30619400  | 1.85669900  | -0.53089100 |
| O | -1.62587600 | 3.12945100  | -1.29092900 |
| O | -1.39515800 | 0.79137000  | -1.89413800 |
| H | -0.58014800 | 0.95767700  | 1.69015300  |
| H | -1.27632700 | 3.33338000  | -2.16814500 |
| S | -1.73406000 | -1.84366100 | 0.03135400  |
| O | -2.82324100 | -0.94235500 | 0.65918300  |
| O | -0.45600800 | -1.22009800 | 0.32555200  |
| O | -1.96340700 | -1.74606200 | -1.48963500 |
| O | -1.96013800 | -3.17047000 | 0.44002100  |
| H | -2.59155700 | 0.02163700  | 0.54396600  |
| H | -1.74577900 | -0.82482400 | -1.79721000 |
| N | 0.30586200  | 0.81084000  | 2.18819400  |
| H | 0.96225900  | 0.42539400  | 1.48327200  |
| C | 0.14425300  | -0.17756600 | 3.27595800  |
| H | -0.53920100 | 0.22007000  | 4.02096500  |
| H | 1.11885500  | -0.35861000 | 3.72038200  |
| H | -0.24655000 | -1.09655700 | 2.85189100  |
| C | 0.84179000  | 2.11528800  | 2.63501600  |
| H | 0.17289400  | 2.53969300  | 3.37840100  |
| H | 0.91259900  | 2.76492700  | 1.76889400  |
| H | 1.82724100  | 1.95249900  | 3.06190900  |
| S | 2.79544500  | -0.53626000 | -0.53188000 |
| O | 4.12694300  | -0.88325600 | -0.82811900 |
| O | 2.33239400  | 0.52668000  | -1.55611000 |
| O | 2.45893400  | -0.05908100 | 0.78773700  |
| H | 1.54344800  | 1.03141700  | -1.22548400 |
| O | 1.90717600  | -1.77072100 | -0.83180200 |
| H | 1.01119600  | -1.66113700 | -0.43474900 |

(DMA)<sub>2</sub>(H<sub>2</sub>SO<sub>4</sub>)

|   |             |             |             |
|---|-------------|-------------|-------------|
| S | -0.04868500 | 0.82524000  | 0.01756500  |
| O | 0.65734700  | -0.06769100 | -1.06049700 |
| O | 0.96331600  | 1.63673200  | 0.63526000  |
| O | -0.65152300 | -0.13603500 | 0.98433800  |
| O | -1.09915900 | 1.51905900  | -0.69946500 |
| H | 1.62950200  | -0.22554400 | -0.76294400 |
| H | -2.97432300 | 0.66863400  | -0.33998700 |
| C | -4.15870000 | -0.61793400 | 0.80456500  |
| H | -5.05532600 | -0.58684800 | 0.18909700  |
| H | -4.24263700 | 0.09976200  | 1.61501900  |
| H | -4.03940500 | -1.61587900 | 1.21836100  |
| N | -2.97649700 | -0.29740800 | -0.00365600 |
| C | -2.75573200 | -1.19348900 | -1.15522000 |

|   |             |             |             |
|---|-------------|-------------|-------------|
| H | -2.02517600 | -0.30057200 | 0.57257700  |
| H | -3.60915100 | -1.15594800 | -1.82852500 |
| H | -1.85218200 | -0.86634600 | -1.66372700 |
| H | -2.62134200 | -2.20562600 | -0.78256300 |
| N | 3.05033800  | -0.27816500 | -0.01436100 |
| C | 4.27684600  | -0.64209000 | -0.70867700 |
| C | 2.81163800  | -1.07909400 | 1.18406300  |
| H | 3.05390200  | 0.70355700  | 0.24609000  |
| H | 4.18821300  | -1.66259600 | -1.08015000 |
| H | 4.42925700  | 0.01922800  | -1.55854400 |
| H | 5.15633900  | -0.59200900 | -0.05832500 |
| H | 2.66928400  | -2.11951800 | 0.89202500  |
| H | 3.64656800  | -1.02892400 | 1.88989100  |
| H | 1.90440200  | -0.72707100 | 1.67131200  |

(DMA)<sub>2</sub>(H<sub>2</sub>SO<sub>4</sub>)<sub>2</sub>

|   |             |             |             |
|---|-------------|-------------|-------------|
| H | -0.53850600 | -1.41133100 | 0.27351400  |
| S | 2.55661000  | -0.08252700 | -0.25327900 |
| O | 3.94685400  | -0.09478000 | 0.53205900  |
| O | 2.42397800  | -1.40178200 | -0.85179100 |
| O | 2.61665000  | 0.99994000  | -1.19767700 |
| O | 1.59293600  | 0.12728800  | 0.82079500  |
| H | 4.66198400  | -0.14808000 | -0.11291300 |
| N | 0.02982000  | -2.27544800 | 0.17346100  |
| H | 0.91799800  | -2.00185600 | -0.29704100 |
| C | -0.70114200 | -3.27228500 | -0.63441200 |
| H | -1.66293400 | -3.46417600 | -0.16795700 |
| H | -0.10986500 | -4.18306500 | -0.68401400 |
| H | -0.86902400 | -2.86417900 | -1.62464300 |
| C | 0.34962200  | -2.73095100 | 1.54201600  |
| H | -0.57891600 | -2.95300500 | 2.06097200  |
| H | 0.88076300  | -1.92862800 | 2.04392500  |
| H | 0.97175400  | -3.62010800 | 1.48500600  |
| H | 0.53847800  | 1.41144300  | 0.27320700  |
| S | -2.55657700 | 0.08243700  | -0.25338900 |
| O | -3.94684800 | 0.09499000  | 0.53189500  |
| O | -1.59294900 | -0.12705300 | 0.82079100  |
| O | -2.42387500 | 1.40148800  | -0.85233000 |
| O | -2.61659800 | -1.00034200 | -1.19742700 |
| H | -4.66195200 | 0.14814200  | -0.11311500 |
| N | -0.02985900 | 2.27552700  | 0.17294000  |
| H | -0.91799600 | 2.00180100  | -0.29756700 |
| C | 0.70112400  | 3.27219100  | -0.63513100 |
| H | 1.66286700  | 3.46425000  | -0.16864000 |

|   |             |            |             |
|---|-------------|------------|-------------|
| H | 0.10981100  | 4.18293200 | -0.68500800 |
| H | 0.86911400  | 2.86383000 | -1.62523800 |
| C | -0.34975900 | 2.73134300 | 1.54136400  |
| H | 0.57873800  | 2.95354800 | 2.06032900  |
| H | -0.88091400 | 1.92912800 | 2.04342900  |
| H | -0.97191200 | 3.62047000 | 1.48409900  |

(DMA)<sub>2</sub>(H<sub>2</sub>SO<sub>4</sub>)<sub>3</sub>

|   |             |             |             |
|---|-------------|-------------|-------------|
| S | 1.29721500  | -1.97900500 | -0.55955600 |
| O | 2.67764800  | -1.95599500 | -0.91182000 |
| O | 0.84225600  | -3.47269600 | -0.60904800 |
| O | 1.04594200  | -1.51434000 | 0.81427400  |
| O | 0.43459300  | -1.25848100 | -1.51306600 |
| H | -1.78347400 | 1.11048800  | 0.00585700  |
| N | 3.07985500  | 0.57365800  | 0.95430800  |
| H | 2.36729700  | -0.17117500 | 0.91068700  |
| H | 2.81688000  | 1.25162900  | 0.20181600  |
| O | 0.33515200  | 1.30286700  | 0.43486800  |
| O | 2.08615900  | 2.43752100  | -0.77004200 |
| S | 0.65476500  | 2.21851200  | -0.65722100 |
| O | -0.15338700 | 3.41580500  | -0.65170800 |
| O | 0.17988700  | 1.47507400  | -1.97579400 |
| H | 0.49444300  | 0.55016900  | -1.95835800 |
| H | -0.08925400 | -3.53082800 | -0.31685000 |
| H | -1.77424700 | 2.71821100  | -0.13901400 |
| N | -2.39002900 | 1.92909300  | 0.13274000  |
| C | -2.73685900 | 2.01734500  | 1.56846200  |
| C | -3.55443800 | 1.82161700  | -0.77205800 |
| C | 4.42711900  | 0.01436800  | 0.71520700  |
| C | 2.94172700  | 1.27234800  | 2.24994400  |
| H | 1.92297100  | 1.63839200  | 2.32393300  |
| H | 3.64255100  | 2.10199700  | 2.27619300  |
| H | 3.15834600  | 0.57451300  | 3.05423300  |
| H | 4.64739000  | -0.71456400 | 1.49042100  |
| H | 5.14973000  | 0.82509300  | 0.74840900  |
| H | 4.43269800  | -0.47330900 | -0.25288200 |
| H | -4.11709500 | 0.93226800  | -0.50182700 |
| H | -4.16619400 | 2.71271600  | -0.66322100 |
| H | -3.18810800 | 1.73422900  | -1.79001000 |
| H | -3.31209500 | 2.92353300  | 1.73553800  |
| H | -3.31567900 | 1.13720800  | 1.83513700  |
| H | -1.81025400 | 2.03803200  | 2.13297600  |
| S | -2.25192800 | -1.54901600 | 0.42307000  |
| O | -3.59977900 | -1.28619000 | 0.77363300  |

|   |             |             |             |
|---|-------------|-------------|-------------|
| O | -1.97205400 | -0.77795700 | -0.89832200 |
| O | -1.78089500 | -2.89163000 | 0.27247000  |
| H | -1.02322900 | -0.98724400 | -1.21760200 |
| O | -1.36527800 | -0.81024000 | 1.45655800  |
| H | -0.38950900 | -1.00243100 | 1.26920600  |

(DMA)<sub>3</sub>(H<sub>2</sub>SO<sub>4</sub>)

|   |             |             |             |
|---|-------------|-------------|-------------|
| S | -0.64261900 | -0.25121900 | -0.66966800 |
| O | -1.94048000 | -0.52887600 | -1.48036700 |
| O | 0.42703900  | -0.14209600 | -1.63959200 |
| O | -0.44063100 | -1.41392800 | 0.21753800  |
| O | -0.85906900 | 0.96421600  | 0.10135400  |
| H | -2.75224300 | -0.41797600 | -0.86160300 |
| H | 2.23583700  | -0.19201300 | 0.30898600  |
| C | 2.86652200  | -1.86355300 | -0.78489800 |
| H | 3.91105700  | -1.55772600 | -0.80203000 |
| H | 2.34965600  | -1.51578200 | -1.67422700 |
| H | 2.80627300  | -2.94768700 | -0.71748800 |
| N | 2.19961100  | -1.26321400 | 0.38216900  |
| C | 2.75742200  | -1.67773100 | 1.67540500  |
| H | 1.15757300  | -1.46860400 | 0.34479100  |
| H | 3.80580800  | -1.39093200 | 1.73098900  |
| H | 2.20223900  | -1.18797200 | 2.47076700  |
| H | 2.67079200  | -2.75632900 | 1.78499300  |
| N | -3.92360400 | -0.13836200 | 0.20845500  |
| C | -4.14018100 | 1.30833100  | 0.21751800  |
| C | -3.44144300 | -0.63079600 | 1.50052500  |
| H | -4.78261900 | -0.61423000 | -0.03891300 |
| H | -3.17459600 | 1.79074500  | 0.35807700  |
| H | -4.54769500 | 1.62266200  | -0.74095000 |
| H | -4.82035600 | 1.61994700  | 1.01656200  |
| H | -2.48988400 | -0.14762800 | 1.71395700  |
| H | -4.14574100 | -0.41613100 | 2.31055300  |
| H | -3.26733200 | -1.70254300 | 1.44092500  |
| N | 2.15283000  | 1.51450100  | 0.21750500  |
| C | 2.80274000  | 1.93340200  | -1.02024800 |
| C | 2.57173500  | 2.30688400  | 1.36546700  |
| H | 1.14173100  | 1.58472600  | 0.10223200  |
| H | 3.87391500  | 1.73354300  | -0.95591500 |
| H | 2.37689400  | 1.36919700  | -1.84671700 |
| H | 2.67095800  | 3.00289300  | -1.21578000 |
| H | 3.63048200  | 2.13426400  | 1.56490000  |
| H | 2.43072600  | 3.38133400  | 1.20566100  |
| H | 2.00094400  | 2.01154600  | 2.24393100  |

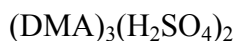

|   |             |             |             |
|---|-------------|-------------|-------------|
| S | 1.26195200  | -0.43743200 | -0.90393500 |
| O | 2.64725700  | -0.17992900 | -1.37754100 |
| C | -2.27783300 | -3.06774500 | 0.22410100  |
| H | -3.34480500 | -3.04083600 | 0.01735000  |
| H | -1.90202900 | -4.08149500 | 0.10919800  |
| H | -2.09461900 | -2.70373600 | 1.23079500  |
| N | 3.76739900  | 0.03352700  | 0.89156400  |
| H | 3.43211300  | -0.02570300 | -0.16654900 |
| H | 2.97507500  | 0.53476900  | 1.30090000  |
| C | 5.03472100  | 0.75492400  | 1.06353400  |
| C | 3.77412400  | -1.34774100 | 1.41657800  |
| H | 4.54033400  | -1.91025800 | 0.88953800  |
| H | 2.80039700  | -1.78926600 | 1.21793600  |
| H | 3.98627400  | -1.33870300 | 2.48319300  |
| H | 5.81643200  | 0.21833600  | 0.53251000  |
| H | 4.93795000  | 1.75341300  | 0.64780000  |
| H | 5.29096100  | 0.81663000  | 2.11901300  |
| O | 1.09545300  | -1.86407400 | -0.58470600 |
| O | 0.27692000  | -0.01104300 | -1.90460300 |
| N | -1.58425600 | -2.17682300 | -0.72325900 |
| C | -1.79155200 | -2.51284400 | -2.14215200 |
| H | -1.91902500 | -1.19557400 | -0.53327000 |
| H | -0.55182700 | -2.15669500 | -0.54337200 |
| H | -1.46341300 | -3.53418200 | -2.32004100 |
| H | -1.19979900 | -1.82359800 | -2.73729300 |
| H | -2.84788300 | -2.41804100 | -2.38190400 |
| C | 0.40329000  | 3.18195000  | -1.08519200 |
| H | 1.23030100  | 2.69325100  | -0.58002900 |
| H | 0.20260000  | 4.15260000  | -0.63840500 |
| H | 0.63433200  | 3.29836500  | -2.14117500 |
| N | -0.78410400 | 2.32392500  | -0.94247500 |
| C | -1.98466600 | 2.84005400  | -1.62353900 |
| H | -1.01986000 | 2.17961600  | 0.07329100  |
| H | -0.53813700 | 1.37803300  | -1.30892700 |
| H | -2.79810000 | 2.14757700  | -1.43347800 |
| H | -2.22750400 | 3.81946600  | -1.21877500 |
| H | -1.78660700 | 2.91935500  | -2.68974000 |
| S | -2.18165200 | 0.46658800  | 1.42069900  |
| O | -3.20677900 | 0.09040100  | 2.33687800  |
| O | -0.96989400 | -0.50608000 | 1.72740200  |
| O | -1.65724100 | 1.82382300  | 1.55846400  |
| O | -2.51307000 | 0.21344100  | 0.00286200  |

|                                                                   |             |             |             |
|-------------------------------------------------------------------|-------------|-------------|-------------|
| O                                                                 | 1.07423400  | 0.36585300  | 0.34770900  |
| H                                                                 | -0.15477800 | -0.17494200 | 1.25070800  |
| (DMA) <sub>3</sub> (H <sub>2</sub> SO <sub>4</sub> ) <sub>3</sub> |             |             |             |
| S                                                                 | -0.60487200 | -1.89418900 | -0.73520900 |
| O                                                                 | 0.57139800  | -2.73632100 | -0.72691500 |
| O                                                                 | -1.75826700 | -2.53162800 | -1.34512700 |
| O                                                                 | -0.93830900 | -1.32226400 | 0.56648300  |
| O                                                                 | -0.20944300 | -0.67946600 | -1.66081300 |
| H                                                                 | 0.35558300  | 2.39719200  | -0.27545600 |
| N                                                                 | 2.67216700  | -2.39970200 | 0.92189200  |
| H                                                                 | 1.92811200  | -2.34349300 | 0.19273700  |
| H                                                                 | 3.34941500  | -1.63106000 | 0.71988700  |
| O                                                                 | 1.70480400  | 0.43978600  | 0.36681300  |
| O                                                                 | 4.05694500  | -0.15645000 | 0.20923800  |
| S                                                                 | 2.91771800  | 0.46617000  | -0.43815700 |
| O                                                                 | 3.20346300  | 1.78181000  | -0.98093500 |
| O                                                                 | 2.62119300  | -0.50014500 | -1.66193000 |
| H                                                                 | 1.65732600  | -0.54791100 | -1.81076300 |
| H                                                                 | -3.13081100 | -1.84201500 | -0.66506300 |
| H                                                                 | 1.91166200  | 2.80267800  | -0.55048600 |
| N                                                                 | 1.01720100  | 3.17591200  | -0.16501800 |
| C                                                                 | 1.19686100  | 3.46056400  | 1.27653100  |
| C                                                                 | 0.52190400  | 4.32764200  | -0.94496400 |
| C                                                                 | 3.31622500  | -3.71982400 | 0.80517300  |
| C                                                                 | 2.02126800  | -2.15623900 | 2.22561100  |
| H                                                                 | 1.59570900  | -1.15795100 | 2.19989600  |
| H                                                                 | 2.76233300  | -2.24055700 | 3.01630000  |
| H                                                                 | 1.23450300  | -2.89350200 | 2.36275800  |
| H                                                                 | 2.55866400  | -4.48967500 | 0.92518800  |
| H                                                                 | 4.07767200  | -3.82043200 | 1.57399200  |
| H                                                                 | 3.76778000  | -3.80200900 | -0.17862000 |
| H                                                                 | -0.44506800 | 4.61784800  | -0.54460500 |
| H                                                                 | 1.23780700  | 5.14077300  | -0.86207000 |
| H                                                                 | 0.41805600  | 4.02633400  | -1.98272000 |
| H                                                                 | 1.94483500  | 4.24218100  | 1.38119400  |
| H                                                                 | 0.24103900  | 3.77423900  | 1.68503500  |
| H                                                                 | 1.52736400  | 2.54437100  | 1.75419000  |
| S                                                                 | -1.94818400 | 1.81191100  | 0.46283000  |
| O                                                                 | -1.96058800 | 3.21185100  | 0.76004800  |
| O                                                                 | -1.30489700 | 1.51079900  | -0.83111100 |
| O                                                                 | -3.23244900 | 1.14221200  | 0.58763300  |
| H                                                                 | -0.65836600 | 0.16201500  | -1.33972500 |
| O                                                                 | -0.97967100 | 1.18897300  | 1.54111800  |

|   |             |             |             |
|---|-------------|-------------|-------------|
| H | -0.76331800 | 0.26810500  | 1.26746900  |
| N | -3.85945500 | -1.33966600 | -0.10975600 |
| C | -4.03379700 | -2.02676800 | 1.18459100  |
| C | -5.10582900 | -1.18820300 | -0.88013800 |
| H | -3.47853300 | -0.38161500 | 0.09539900  |
| H | -4.45647100 | -3.01384800 | 1.01519900  |
| H | -3.05703600 | -2.10951400 | 1.65064700  |
| H | -4.69829600 | -1.43482200 | 1.80871400  |
| H | -5.53196000 | -2.16842700 | -1.07779900 |
| H | -5.80405200 | -0.58722400 | -0.30346700 |
| H | -4.88116100 | -0.68604600 | -1.81593000 |
